# Supplementary material
Source: Springer Nature journal article supplement (https://www.springermedizin.de/resource/supplementary/12974_2005_40_MOESM1_ESM.pdf/9600642)

**GFAP**

**Active Caspase 3**

**Untreated**

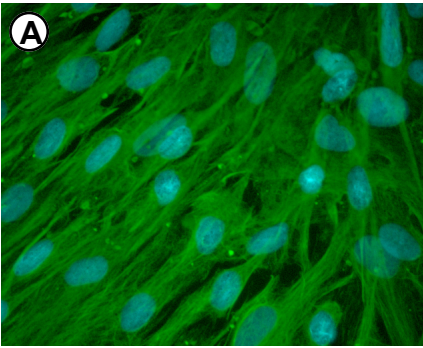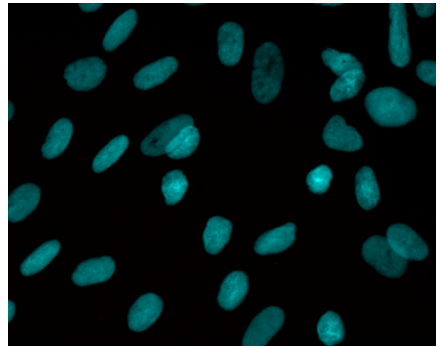

**QUIN  
350 nM**

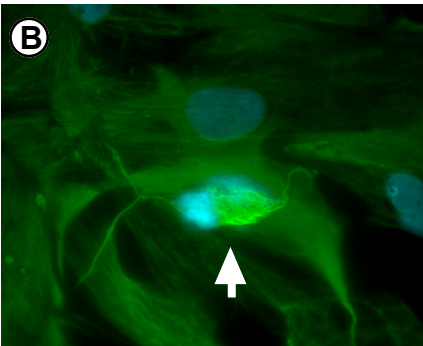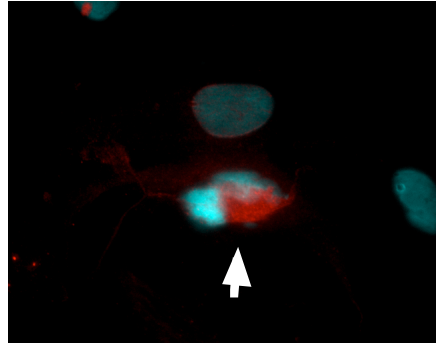

**QUIN  
500 nM**

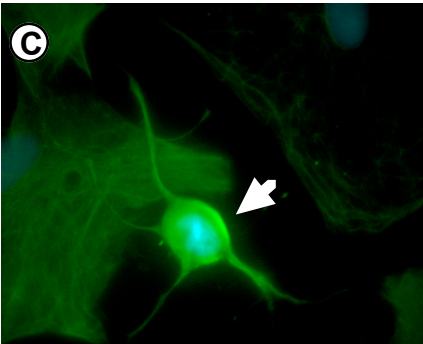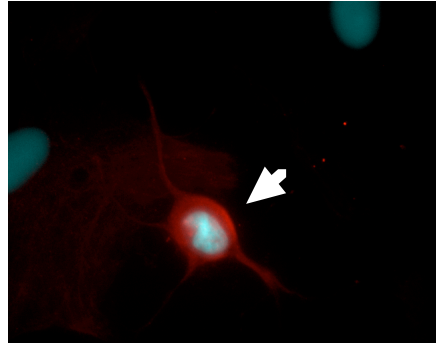

**QUIN  
1200 nM**

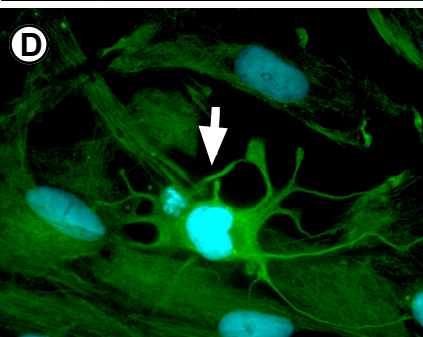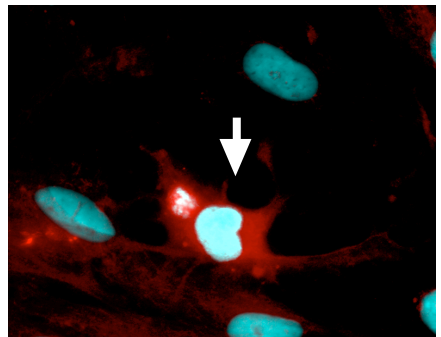

**Cyclo  
heximide**

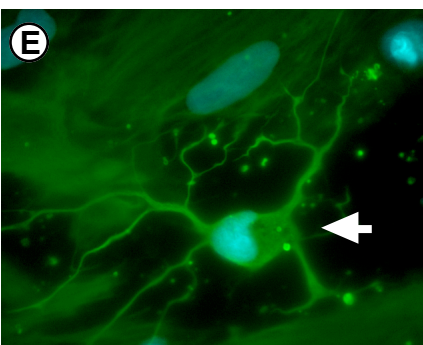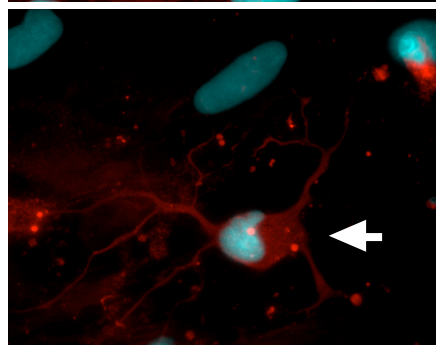

Supplement: MOESM1 [file 9600642]
